# Supplementary material
Source: PubMed Central journal article supplement (PMC2582542)

**Supplementary figure 1.** Extract (120  $\mu\text{g}$ ) from SF9 cells expressing recombinant SRC-1 was incubated with 800 units of lambda phosphatase on ice for one hour. Aliquots (10  $\mu\text{g}$ ) of control or treated extract were run on SDS gels and phospho SRC-1 detected with the P-1185 and P-1179 antibodies.

Supplemental Figure 1

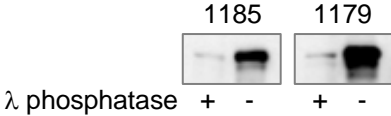

Supplement: me.2007-0481_1.pdf [file me.2007-0481_1.pdf]
